FEATURED INSECT

*Thereva* sp. (Diptera: Asiloidea: Therevidae)

This is a photograph of the predatory stiletto fly taken in Gallatin County, Montana.

Submitted by Robert K. D. Peterson, 334 Leon Johnson Hall, Montana State University, Bozeman, MT 59717-3120, bpeterson@montana.edu

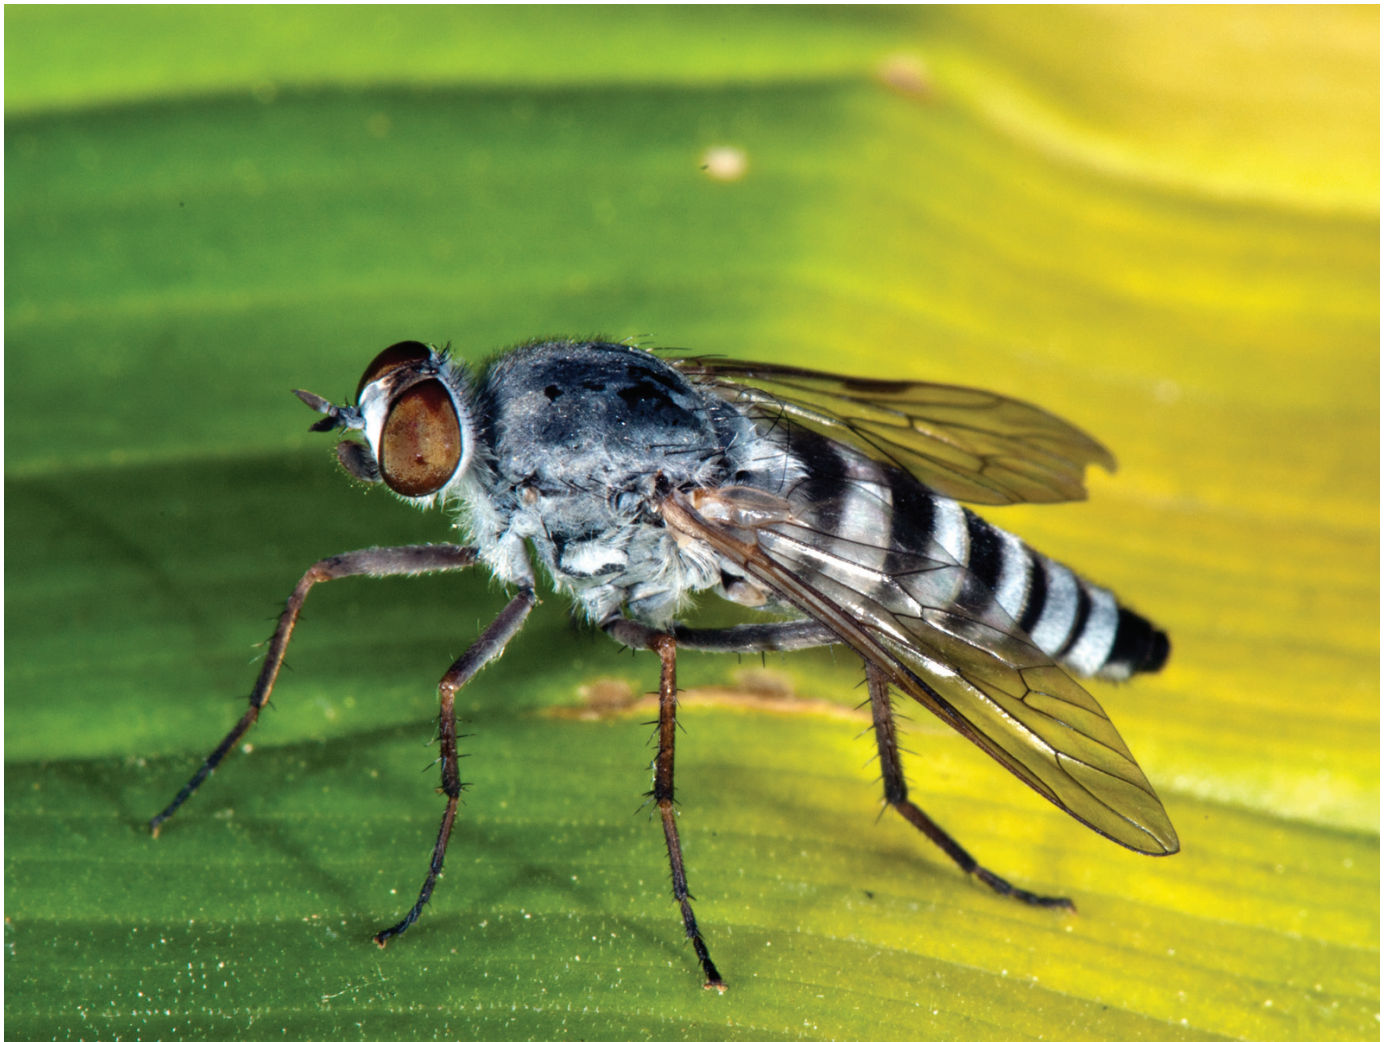

If you have a photograph of an insect you would like to have considered for *American Entomologist's* Featured Insect series, please e-mail it as a 300-dpi TIFF to the editor at [cdarwin@aol.com](mailto:cdarwin@aol.com).
